# Supplementary material
Source: Springer Nature journal article supplement (https://www.springermedizin.de/resource/supplementary/12935_2011_311_MOESM9_ESM.pdf/9540272)

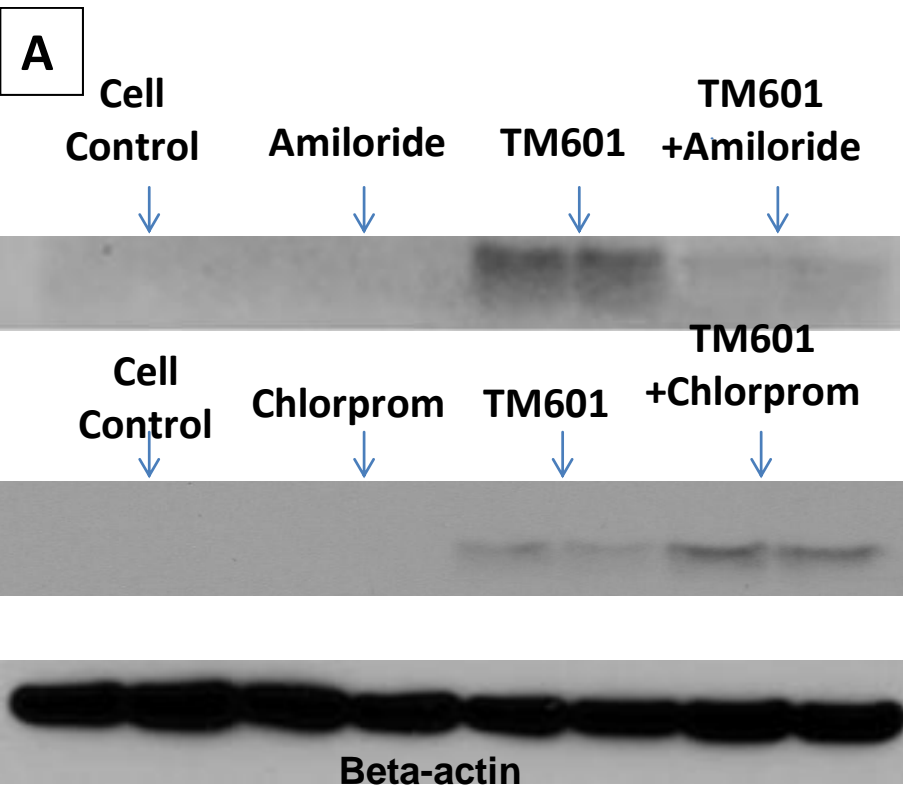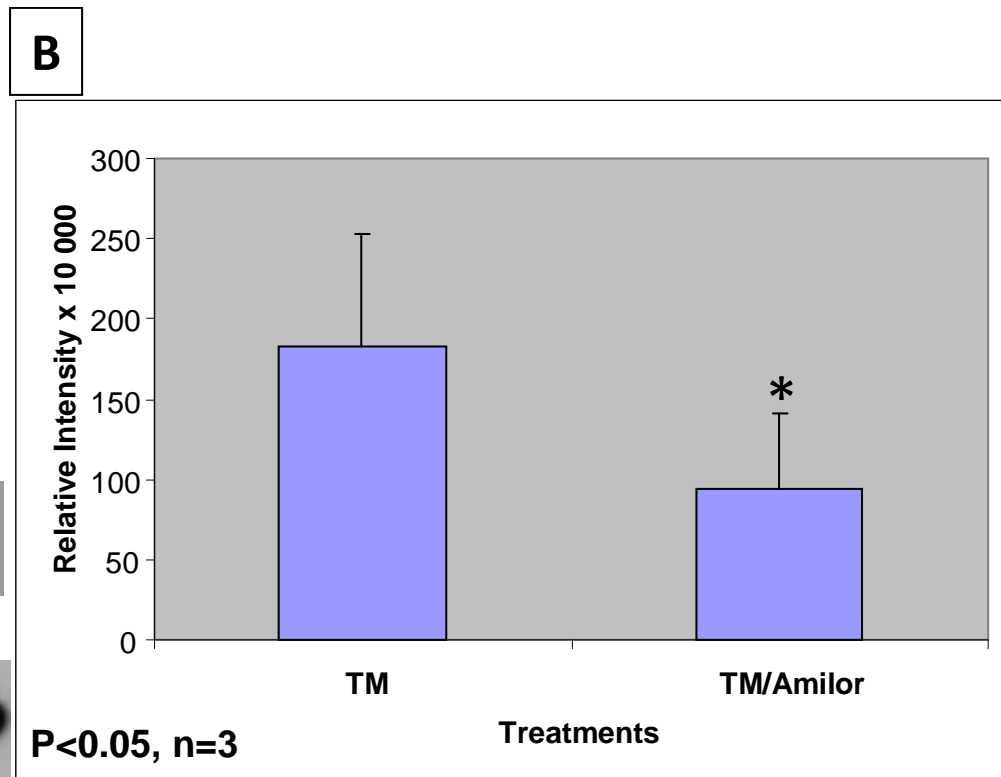

Supplement: MOESM9 [file 9540272]
